# Supplementary material for: Local chromatin environment of a Polycomb target gene instructs its own epigenetic inheritance
Source: eLife journal article supplement (doi:10.7554/elife.07205), 2015-05-08
Supplement: supp [file elife_poa_e07205_Figure_1_figure_supplement_1.pdf › elife_poa_e07205_Figure_1_figure_supplement_1.pdf]

**A**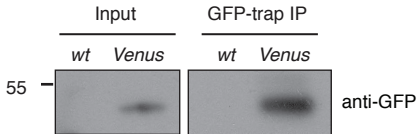**B**

| Start-End | Sequence                | Actual peptide mass (Da) | Mascot ion score |
|-----------|-------------------------|--------------------------|------------------|
| 54-65     | (K)LYSFSSGDNLVK(I)      | 1328.66                  | 82.4             |
| 87-103    | (K)ALNYGSHYELLELVDSK(L) | 1949.98                  | 42.5             |
| 142-149   | (K)LVENLKEK(E)          | 971.57                   | 35.6             |
