# Supplementary material for: Local chromatin environment of a Polycomb target gene instructs its own epigenetic inheritance
Source: eLife journal article supplement (doi:10.7554/elife.07205), 2015-05-08
Supplement: supp [file elife_poa_e07205_Figure_2_figure_supplement_5.pdf › elife_poa_e07205_Figure_2_figure_supplement_5.pdf]

**A**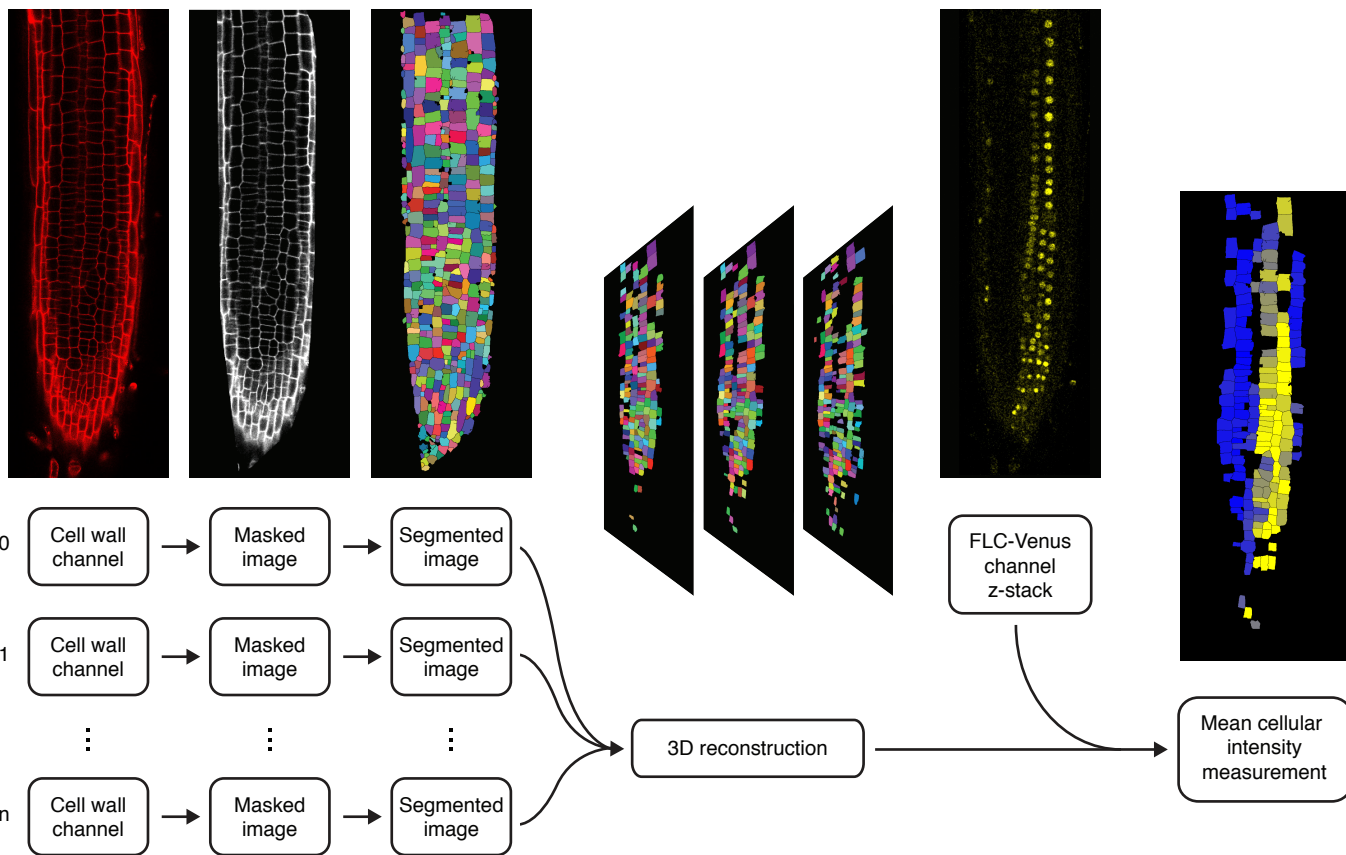**B**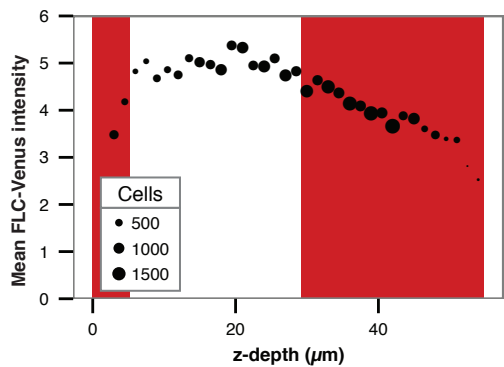**C**

| Weeks cold    | Number of roots | Number of cells reconstructed in 3D | Proportion of 2D segments reconstructed as 3D cells | Final number of cells in z-range (% of reconstructed) |
|---------------|-----------------|-------------------------------------|-----------------------------------------------------|-------------------------------------------------------|
| 2             | 11              | 3741                                | 30%                                                 | 1610 (43%)                                            |
| 4             | 10              | 3554                                | 31%                                                 | 1465 (41%)                                            |
| 6             | 12              | 5673                                | 30%                                                 | 2033 (36%)                                            |
| 8             | 12              | 4998                                | 28%                                                 | 2067 (41%)                                            |
| 10            | 8               | 3306                                | 26%                                                 | 1372 (42%)                                            |
| <i>Total:</i> | 53              | 21272                               | 29%                                                 | 8547 (40%)                                            |
