# Supplementary figures and images for: Local chromatin environment of a Polycomb target gene instructs its own epigenetic inheritance
Source: eLife journal article supplement (doi:10.7554/elife.07205), 2015-05-08

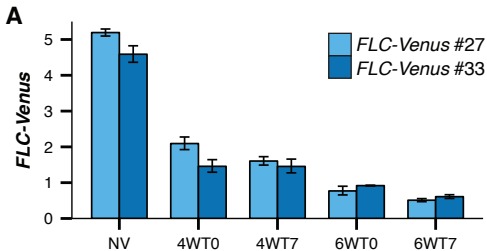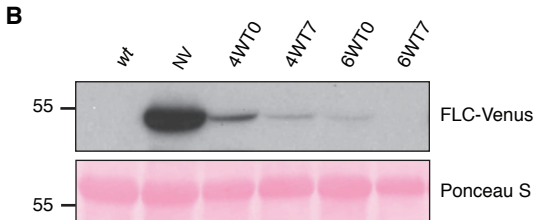

Supplement: supp [file elife_poa_e07205_Figure_2_figure_supplement_1.pdf › elife_poa_e07205_Figure_2_figure_supplement_1.pdf]

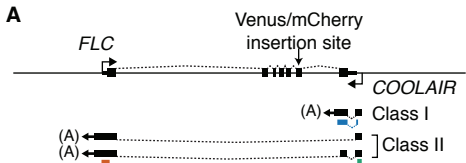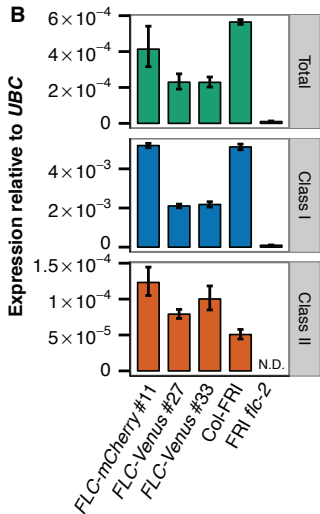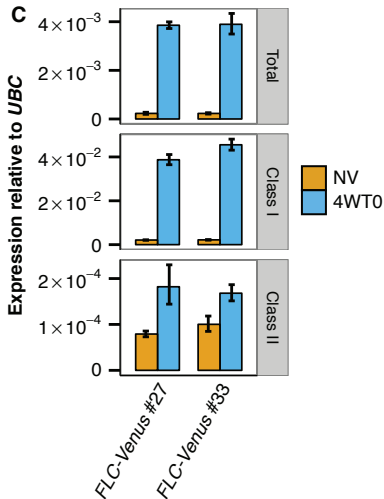

Supplement: supp [file elife_poa_e07205_Figure_2_figure_supplement_2.pdf › elife_poa_e07205_Figure_2_figure_supplement_2.pdf]

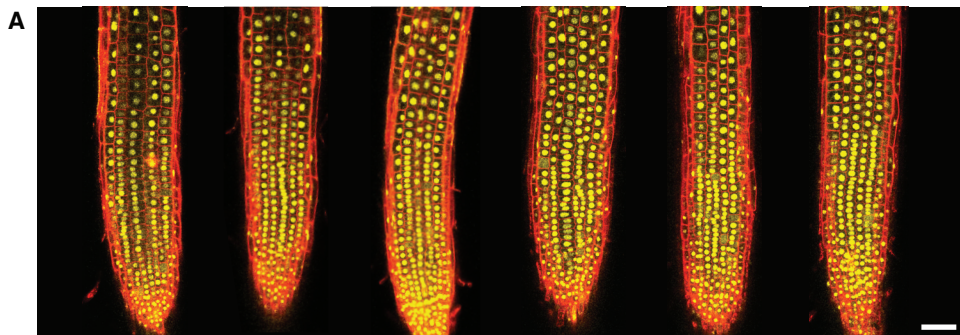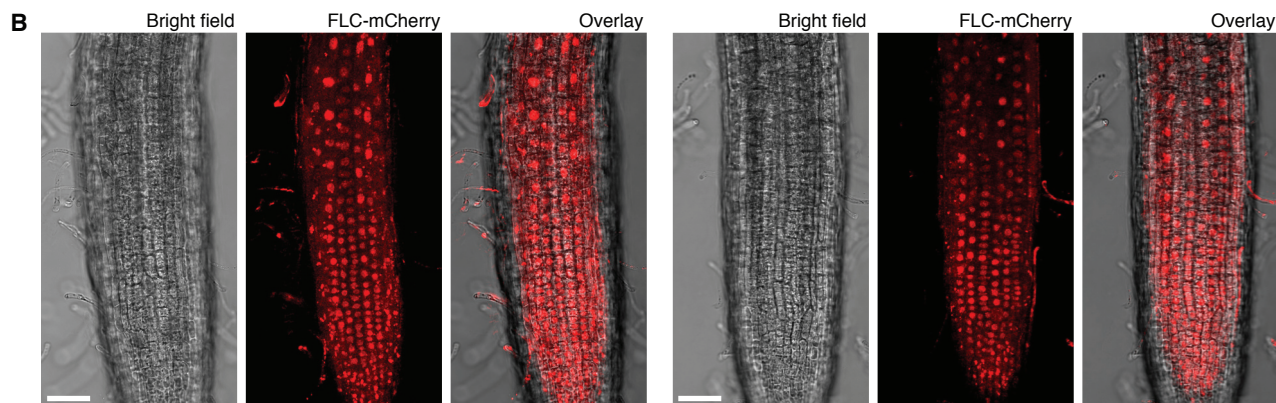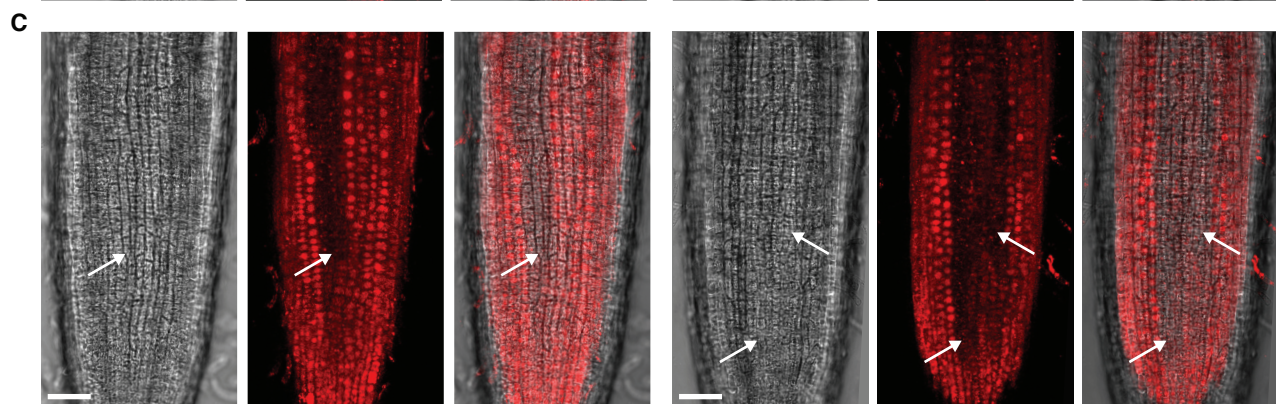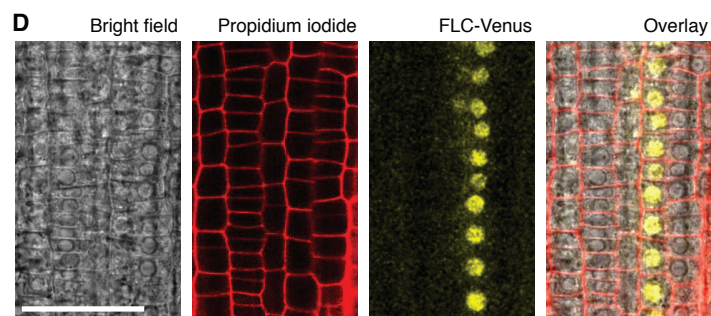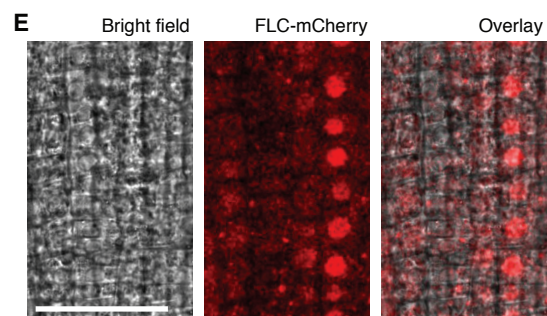

Supplement: supp [file elife_poa_e07205_Figure_2_figure_supplement_3.pdf › elife_poa_e07205_Figure_2_figure_supplement_3.pdf]

10 weeks

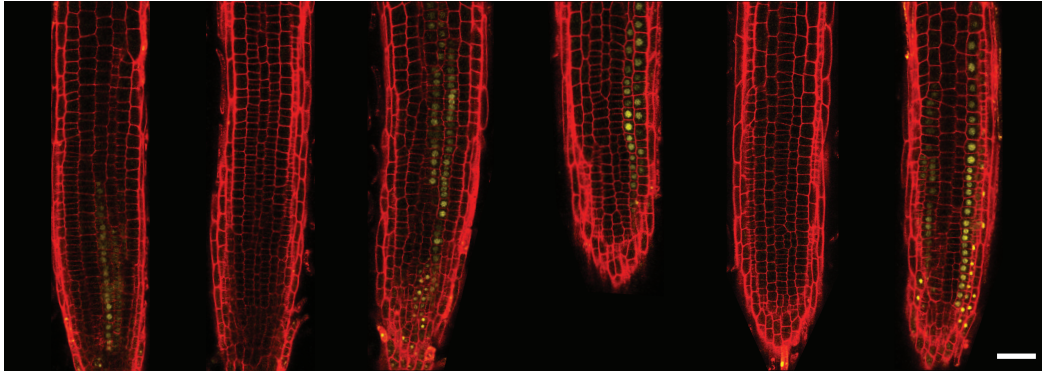

8 weeks

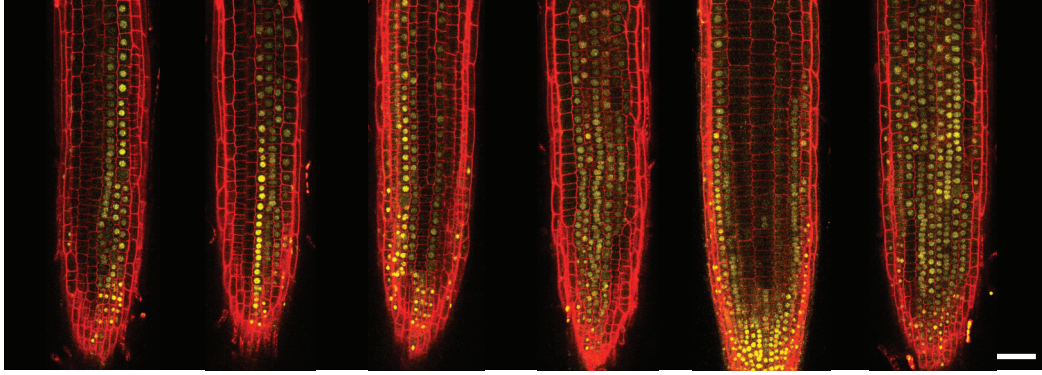

6 weeks

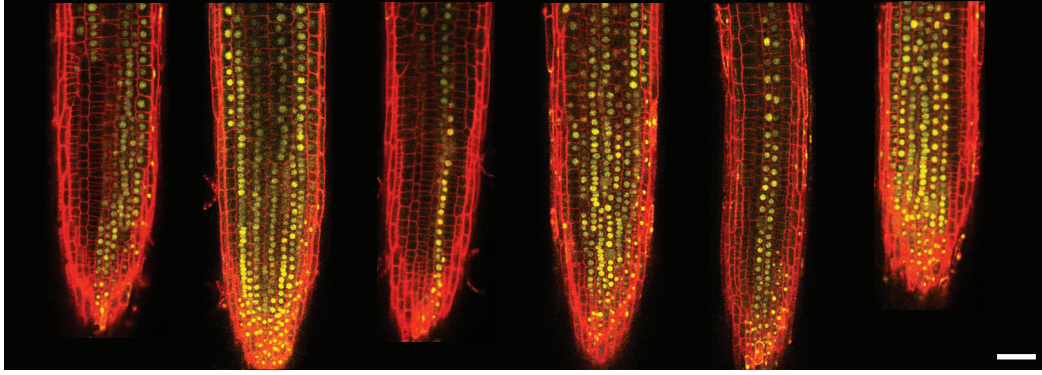

4 weeks

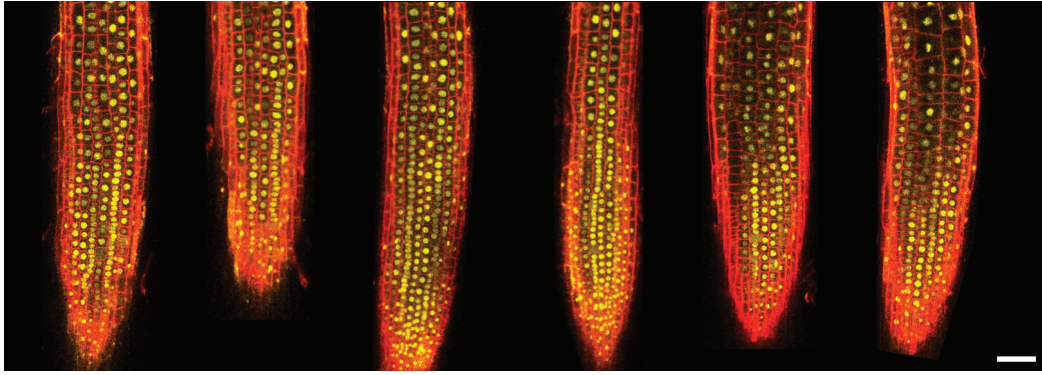

2 weeks

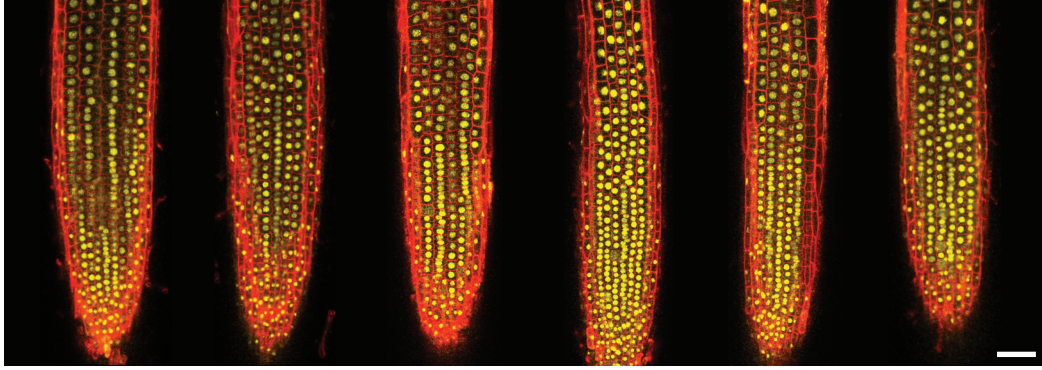

Supplement: supp [file elife_poa_e07205_Figure_2_figure_supplement_4.pdf › elife_poa_e07205_Figure_2_figure_supplement_4.pdf]

Propidium iodide

FLC-Venus

Overlay

Quantified cells

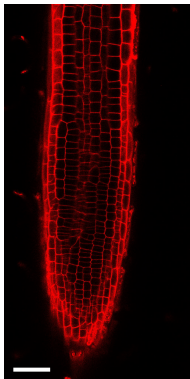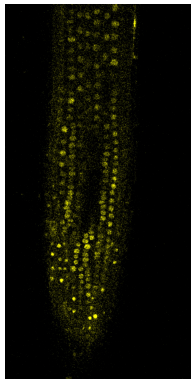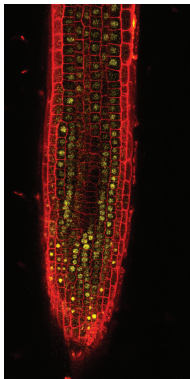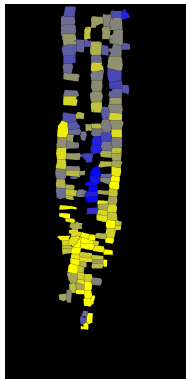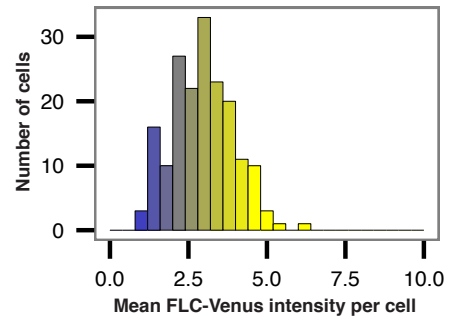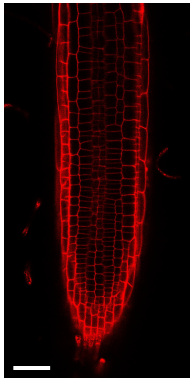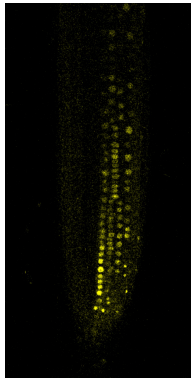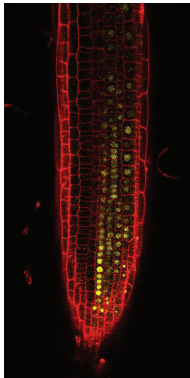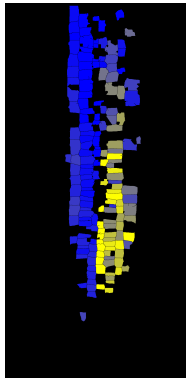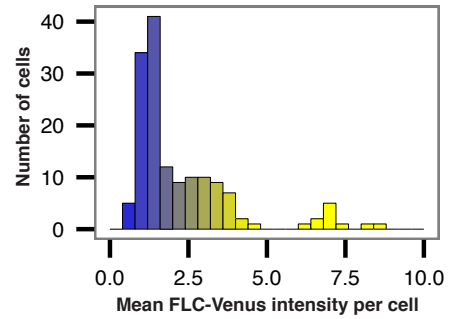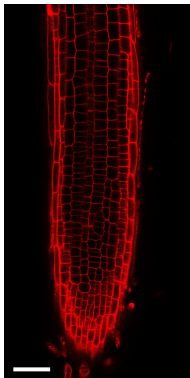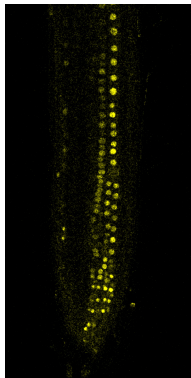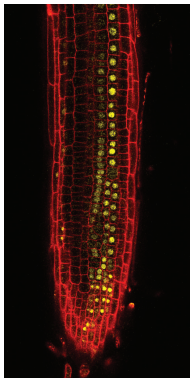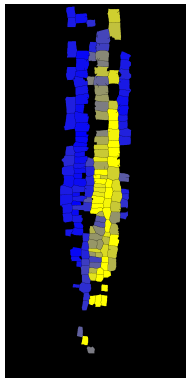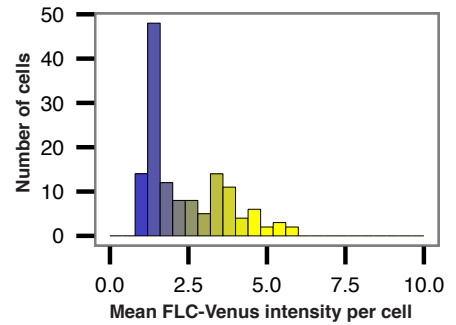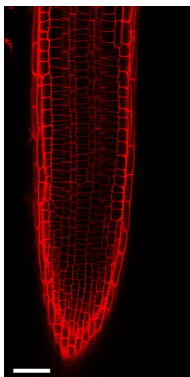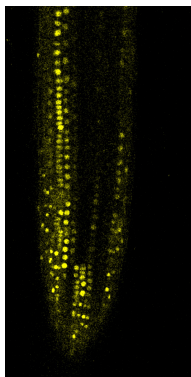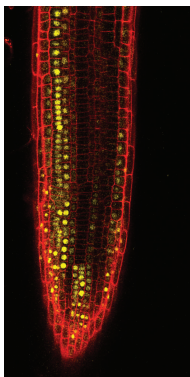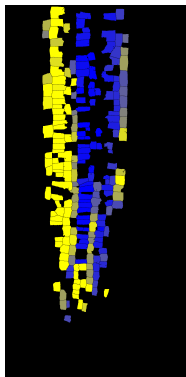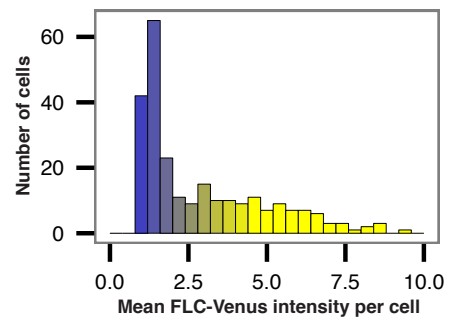

Supplement: supp [file elife_poa_e07205_Figure_2_figure_supplement_6.pdf › elife_poa_e07205_Figure_2_figure_supplement_6.pdf]

Bright field

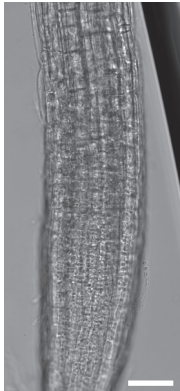

FLC-Venus

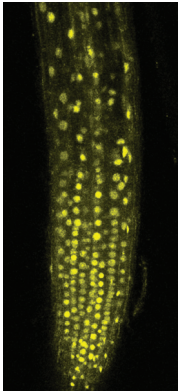

FLC-mCherry

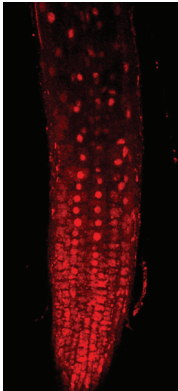

Overlay

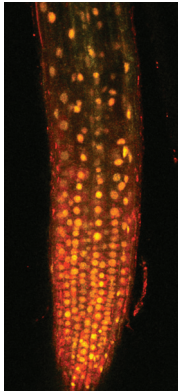

Supplement: supp [file elife_poa_e07205_Figure_3_figure_supplement_1.pdf › elife_poa_e07205_Figure_3_figure_supplement_1.pdf]

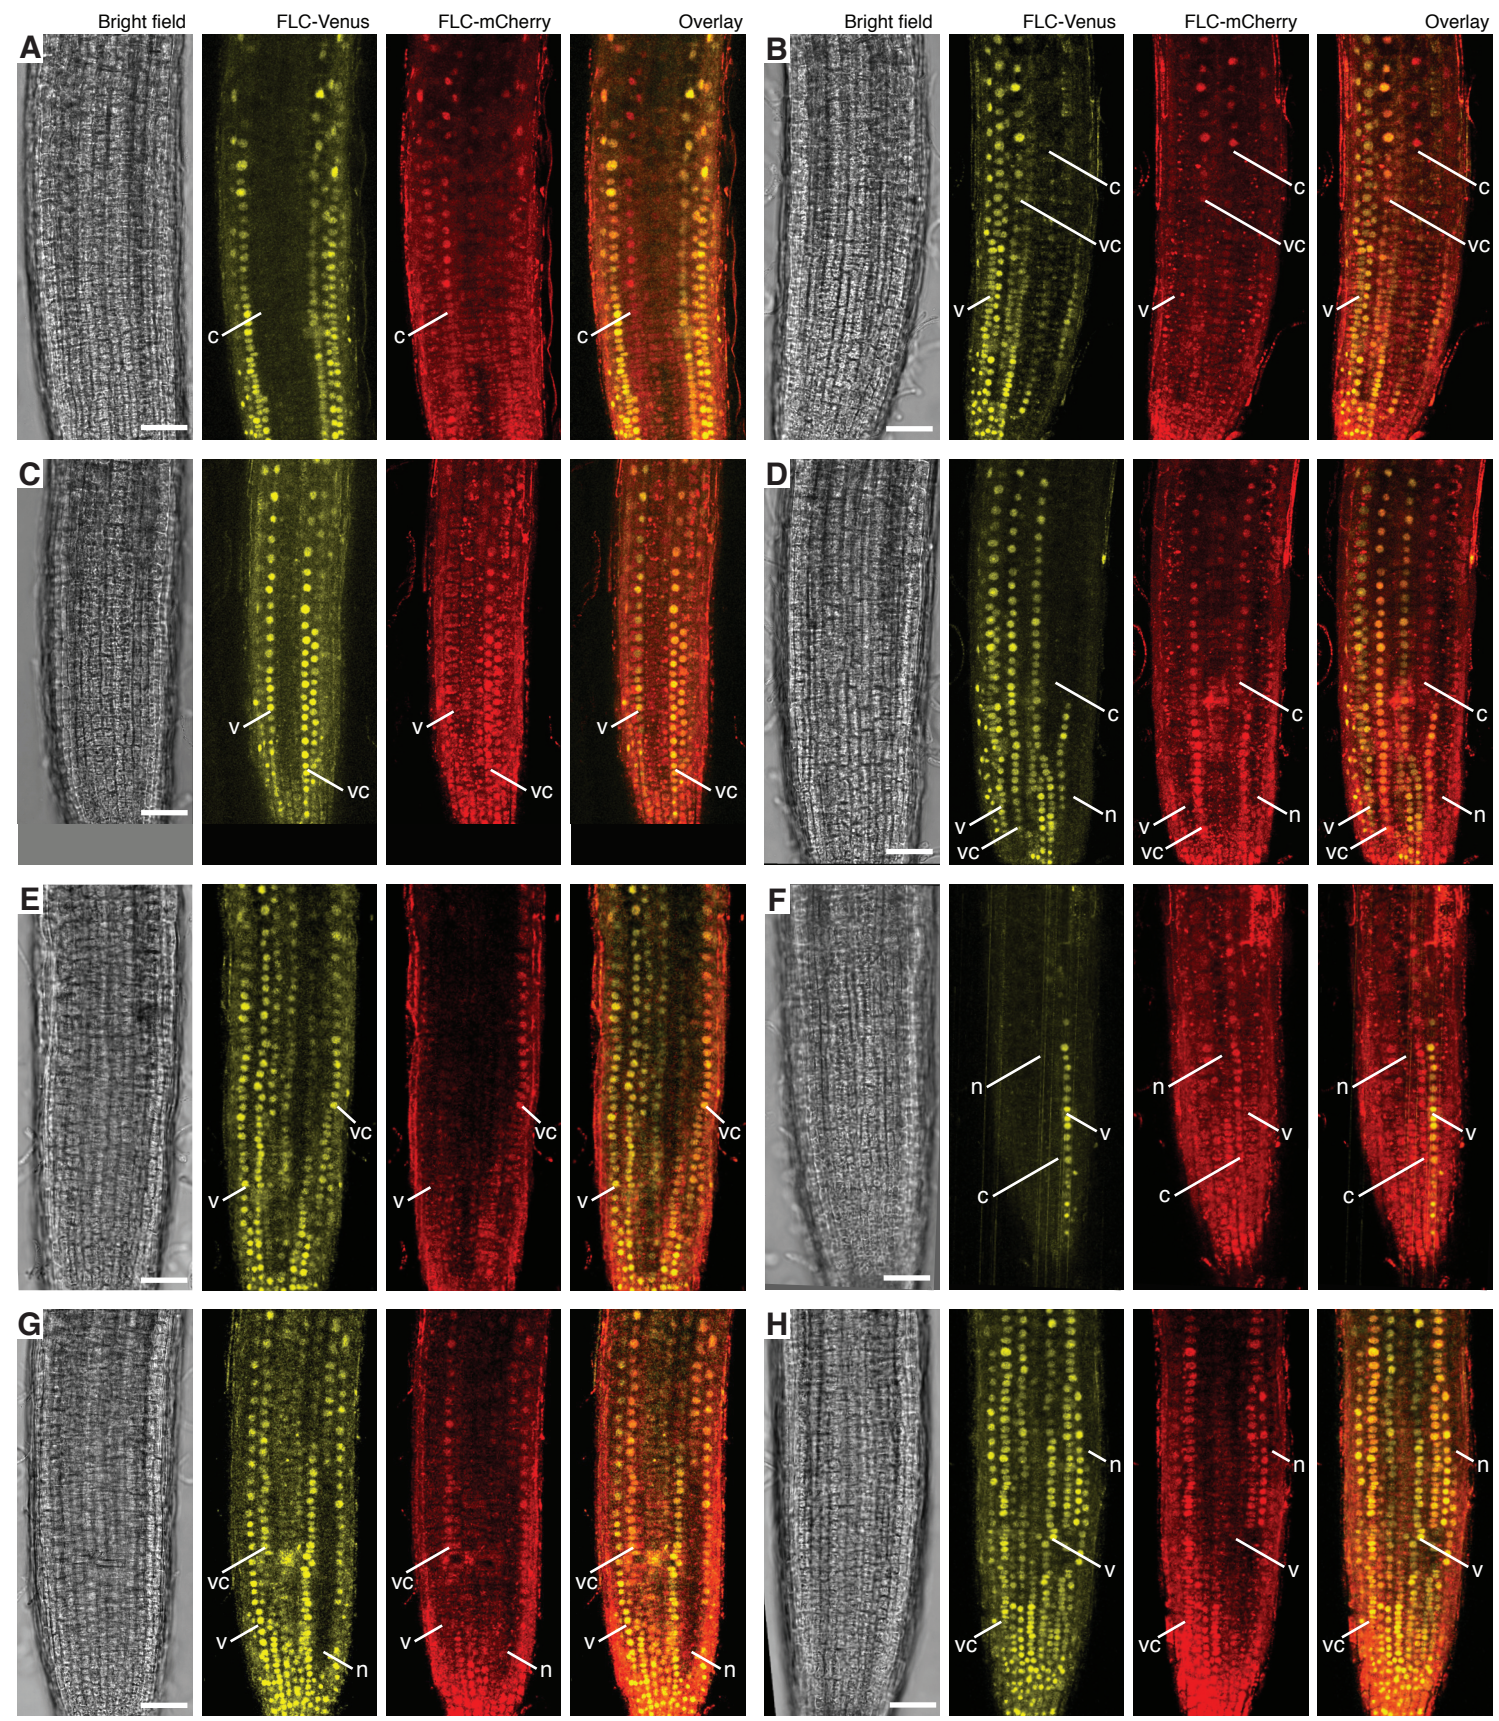

Supplement: supp [file elife_poa_e07205_Figure_3_figure_supplement_2.pdf › elife_poa_e07205_Figure_3_figure_supplement_2.pdf]
